# Supplementary material
Source: publisher figshare collection journal article supplement (https://acs.figshare.com/ndownloader/files/14210624)
Supplement: Supplementary file 1 [file 14210624]

## Supporting Information

# Novel interfacial bulk heterojunction technique for enhanced response in ZnO nanogenerator

*Rajagopalan Pandey<sup>1,2</sup>, Nirmal Prasanth Maria Joseph Raj<sup>2</sup>, Vipul Singh<sup>3</sup>, Palani Iyamperumal Anand<sup>1,4\*</sup>, Sang Jae Kim<sup>2\*</sup>*

<sup>1</sup>Mechatronics and Instrumentation Lab, Discipline of Metallurgy Engineering and Materials Science, Mechatronics and Instrumentation Lab, Indian Institute of Technology Indore, Indore, India.

<sup>2</sup>Nano materials and systems Lab, Department of Mechatronics Engineering, Jeju National University, Jeju, South Korea

<sup>3</sup>Molecular and Nano-electronics Research Group (MNRG), Discipline of Electrical Engineering, Indian Institute of Technology Indore, Indore, India.

<sup>4</sup>Mechatronics and Instrumentation Lab, Discipline of Mechanical Engineering, Indian Institute of Technology Indore, Indore, India.

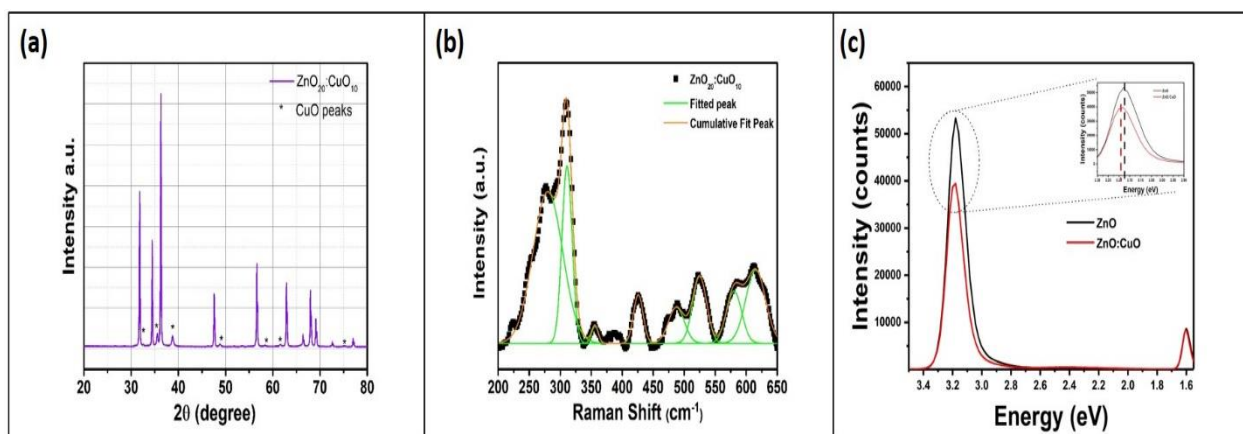

Figure S1. X-Ray diffraction of  $\text{ZnO}:\text{C}_{10}$  sample (a) Raman of ZnO and CuO (b) Raman spectra of  $\text{ZnO}:\text{C}_{10}$  sample (c) Photoluminescence of ZnO and of  $\text{ZnO}:\text{C}_{10}$  sample

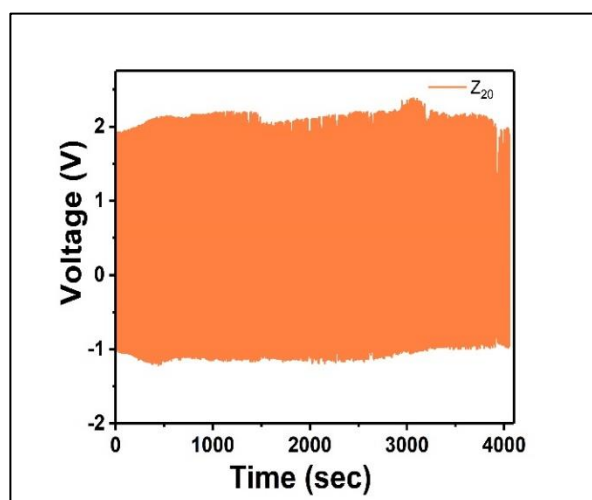

Figure S2. Reliability studies of  $\text{ZnO} - \text{Z}_{20}$  Sample

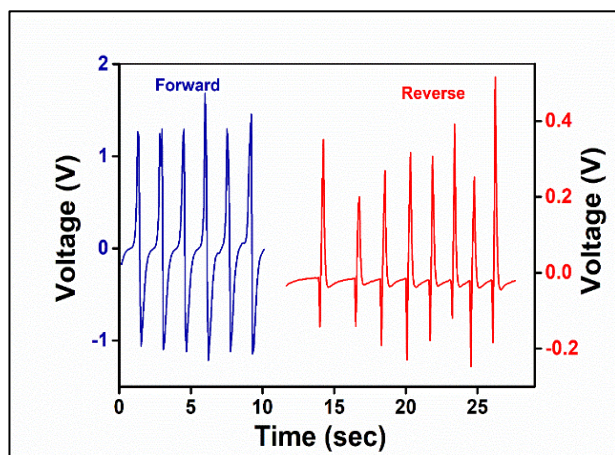

Figure S3. Piezoelectric output in forwards and reverse connection

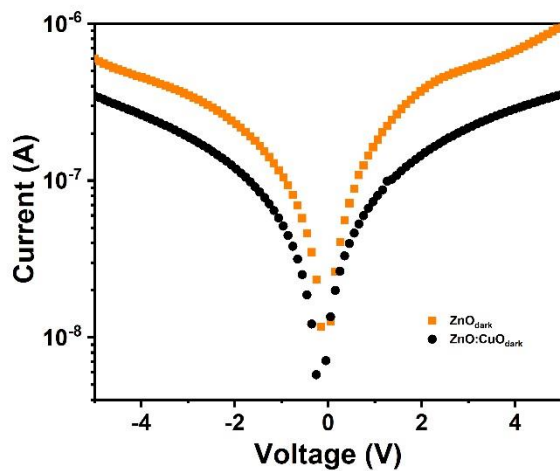

Figure S4.  $IV_{\text{dark}}$  plot for ZnO and ZnO:C<sub>10</sub>

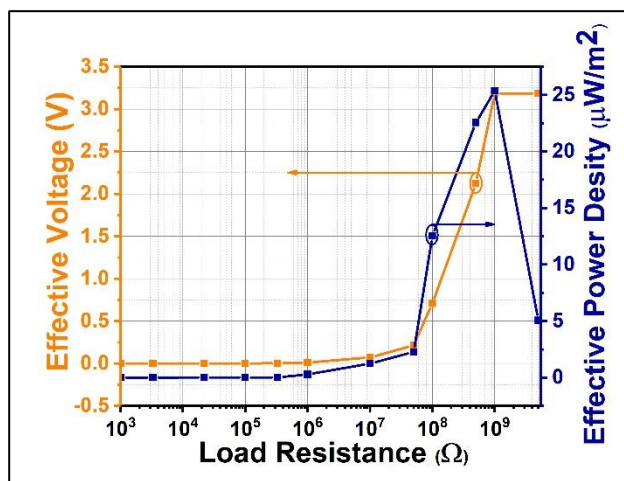

Figure S5. Effective power density calculation

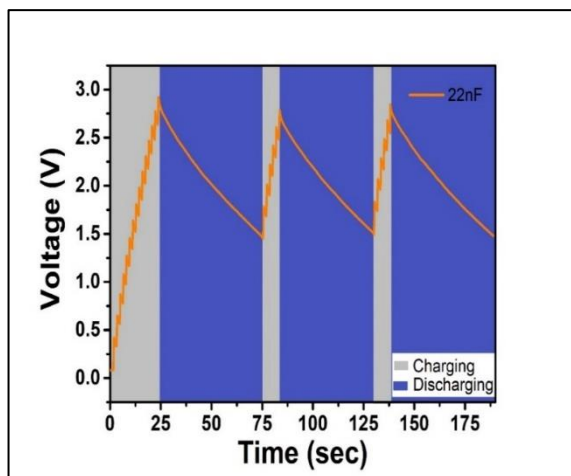

Figure S6. Charging and discharging 22nF capacitor

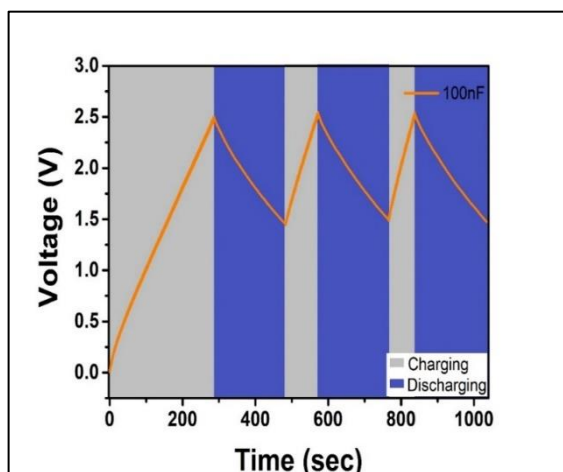

Figure S7. Charging and discharging 100nF capacitor

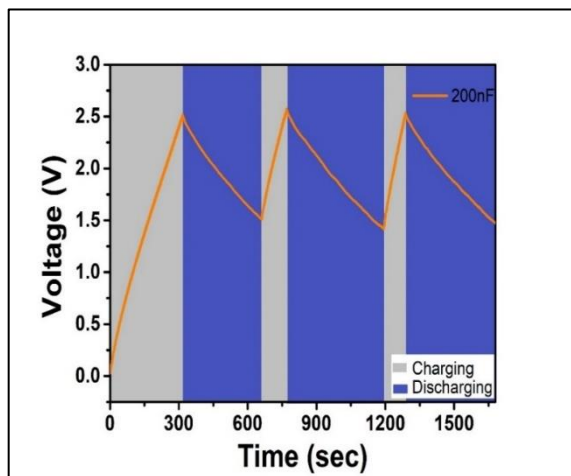

Figure S8. Charging and discharging 200nF capacitor

Table S1. Supplementary data for simulation

|                       | ZnO              | CuO   | Air |
|-----------------------|------------------|-------|-----|
| Relative permittivity | {8.5, 8.5, 10.2} | 100   | 1   |
| potential             | 1 V              | 0     | 0   |
| radius                | 1 $\mu$ m        | 100nm | -   |

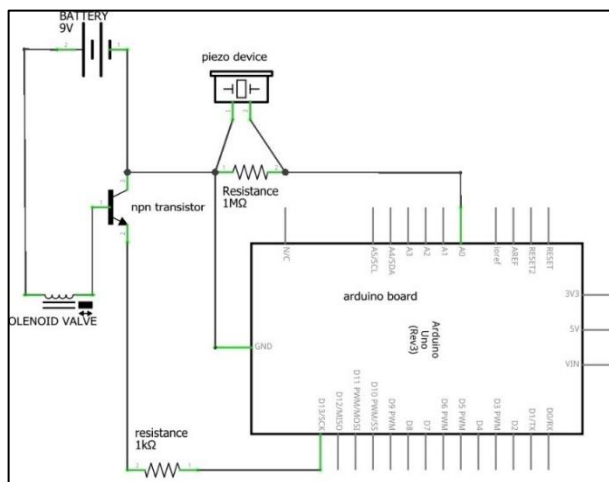

Figure S9: circuit diagram for PSU
